# Supplementary material for: Sensitive and fast mid-wave infrared graphene/HgCdTe van der Waals heterojunction empowered by interface engineering
Source: Research Square preprint supplement (doi:10.21203/rs.3.rs-7751016/v1), 2025-11-18
Supplement: Supplementary file 2 [file d49f1310bd4f4ce6bdd0ba3b.docx]

Title for the file containing supporting information: Supplementary Note and figure.

The file includes a detailed derivation of the method for calculating the carrier density and Fermi level position in graphene, along with nine supplementary figures providing supporting data.
